# Supplementary material for: Low resolution scans can provide a sufficiently accurate, cost- and time-effective alternative to high resolution scans for 3D shape analyses
Source: PeerJ. 2018 Jun 22;6:e5032. doi: 10.7717/peerj.5032 (PMC6016532; doi:10.7717/peerj.5032)
Supplement: Supplemental Information 6 — This table only includes the points which have bilateral symmetry (i.e., a symmetric pair with one point on the right side of the skull and the other point in the corresponding symmetric location on the left side of the skull). The numbers in the “Right” column are landmarks with their respective bilateral landmark pair in the “Left” column of numbers. Points include landmarks, semi-landmarks, and patch points. Points placed along the skull’s center line are not included as they do not come in symmetric pairs. This table is necessary to isolate the symmetric component of shape in geomorph using the bilat.symmetry() function. See R script for further information and use. [file peerj-06-5032-s008.csv]

Right	Left
1	5
2	6
3	7
4	8
9	13
10	14
11	15
12	16
17	18
20	24
19	25
21	26
22	27
23	28
29	30
31	32
33	36
34	37
35	38
39	40
41	44
42	45
43	46
47	51
48	52
49	53
50	54
56	57
58	61
59	62
60	63
64	65
67	85
68	79
69	86
70	80
71	78
72	81
73	84
74	82
75	83
76	87
77	88
89	90
91	92
93	94
95	96
97	98
100	101
102	105
103	106
104	107
108	112
109	113
110	114
111	115
116	125
117	128
118	127
119	130
120	131
121	124
122	129
123	126
132	135
133	136
134	137
138	144
139	145
140	147
141	146
142	143
148	149
150	151
152	160
153	166
154	163
155	161
156	165
157	164
158	167
159	162
168	174
169	175
170	176
171	177
172	178
173	179
180	181
182	189
183	190
184	191
185	192
186	193
187	194
188	195
196	203
197	204
198	205
199	206
200	207
201	208
202	209
210	212
211	213
214	218
215	219
216	217
220	221
222	241
223	234
224	237
225	239
226	240
227	236
228	235
229	238
230	231
232	233
242	246
243	247
244	248
245	249
252	253
277	278
279	280
281	282
285	286
287	288
