# Supplementary material for: Low resolution scans can provide a sufficiently accurate, cost- and time-effective alternative to high resolution scans for 3D shape analyses
Source: PeerJ. 2018 Jun 22;6:e5032. doi: 10.7717/peerj.5032 (PMC6016532; doi:10.7717/peerj.5032)
Supplement: Table S1 — Catalogue numbers are searchable in the Queensland Museum database, which also provided the sex information for the 19 delicate mouse (Pseudomys delicatulus) specimens we used in our study. [file peerj-06-5032-s001.xlsx]

## Sheet: TableS1
Catalog Number	Sex
JM11502	f
JM12663	f
JM12690	f
JM12695	f
JM12708	f
JM15148	f
JM18715	f
JM2133	m
JM11350	m
JM12660	m
JM19635	m
JM3771	u
JM4042	u
J4215	u
JM4957	u
JM10699	u
JM12387	u
JM13835	u
JM18195	u
